# Supplementary material for: Independent association of glucocorticoids with damage accrual in SLE
Source: PubMed Central journal article supplement — Lupus Sci Med. 2016 Nov 22;3(1):e000157. doi: 10.1136/lupus-2016-000157 (PMC5133410; doi:10.1136/lupus-2016-000157), 2016-11-22
Supplement: lupus-2016-000157supp_tables.pdf [file lupus-2016-000157supp_tables.pdf]

**Supplementary Table 1 – Association of time-adjusted mean prednisolone with damage accrual**

|                                                 | Unadjusted odds ratio for damage accrual ( $\Delta$ SDI>0) |              |         | Adjusted* odds ratio for damage accrual ( $\Delta$ SDI>0) |               |         |
|-------------------------------------------------|------------------------------------------------------------|--------------|---------|-----------------------------------------------------------|---------------|---------|
|                                                 | OR                                                         | (95% CI)     | P-value | OR                                                        | (95% CI)      | P-value |
| <u>Gender</u>                                   |                                                            |              |         |                                                           |               |         |
| Female                                          | 1                                                          |              |         |                                                           |               |         |
| Male                                            | 1.38                                                       | (0.57, 3.35) | 0.5     |                                                           |               |         |
| <u>Age at recruitment (years)</u>               |                                                            |              |         |                                                           |               |         |
| <40                                             | 1                                                          |              |         |                                                           |               |         |
| $\geq$ 40 & $\leq$ 59                           | 0.96                                                       | (0.47, 1.95) | 0.9     |                                                           |               |         |
| $\geq$ 60                                       | 1.29                                                       | (0.51, 3.22) | 0.6     |                                                           |               |         |
| <u>Ethnicity</u>                                |                                                            |              |         |                                                           |               |         |
| Caucasian                                       | 1                                                          |              |         | 1                                                         |               |         |
| Asian                                           | 0.44                                                       | (0.22, 0.89) | 0.02    | 0.28                                                      | (0.12, 0.63)  | P<0.01  |
| Other                                           | 0.81                                                       | (0.18, 3.58) | 0.8     | 0.77                                                      | (0.15, 3.95)  | 0.75    |
| <u>Current smoker?</u>                          |                                                            |              |         |                                                           |               |         |
| No                                              | 1                                                          |              |         |                                                           |               |         |
| Yes                                             | 1.33                                                       | (0.56, 3.18) | 0.5     |                                                           |               |         |
| <u>Baseline SDI</u>                             |                                                            |              |         |                                                           |               |         |
| SDI = 0                                         | 1                                                          |              |         | 1                                                         |               |         |
| SDI $\geq$ 1                                    | 3.12                                                       | (1.58, 6.17) | p<0.01  | 2.81                                                      | (1.32, 5.96)  | p<0.01  |
| <u>Time adjusted mean SLEDAI (AMS)</u>          |                                                            |              |         |                                                           |               |         |
| AMS $\leq$ 4                                    | 1                                                          |              |         | 1                                                         |               |         |
| AMS > 4                                         | 3.18                                                       | (1.63, 6.22) | p<0.01  | 2.16                                                      | (0.93, 5.96)  | 0.07    |
| <u>Time-adjusted mean prednisolone (mg/day)</u> |                                                            |              |         |                                                           |               |         |
| 1 <sup>st</sup> quartile (0, 0)                 | 1                                                          |              |         | 1                                                         |               |         |
| 2 <sup>nd</sup> quartile (0.04, 4.40)           | 2.21                                                       | (0.69, 6.71) | 0.16    | 2.48                                                      | (0.76, 8.13)  | 0.13    |
| 3 <sup>rd</sup> quartile (4.45, 7.77)           | 5.56                                                       | (1.92, 16.1) | p<0.01  | 5.63                                                      | (1.71, 18.58) | p<0.01  |
| 4 <sup>th</sup> quartile (7.82, 40.0)           | 5.83                                                       | (2.01, 16.9) | p<0.01  | 5.02                                                      | (1.42, 17.75) | 0.01    |

\*Odds ratios were adjusted for ethnicity, baseline SDI, AMS and time-adjusted mean prednisolone

**Supplementary Table 2. Association of time-adjusted mean prednisolone with GC-SDI and nonGC-SDI damage accrual**

|                                                 | GC-SDI accrual (n=14)                       |              |         |                                            |               |         | nonGC-SDI accrual (n=50)                       |              |         |                                                |               |         |
|-------------------------------------------------|---------------------------------------------|--------------|---------|--------------------------------------------|---------------|---------|------------------------------------------------|--------------|---------|------------------------------------------------|---------------|---------|
|                                                 | Unadjusted odds ratio for $\Delta$ GC-SDI>0 |              |         | Adjusted* odds ratio for $\Delta$ GC-SDI>0 |               |         | Unadjusted odds ratio for $\Delta$ nonGC-SDI>0 |              |         | Adjusted** odds ratio for $\Delta$ nonGC-SDI>0 |               |         |
|                                                 | OR                                          | (95% CI)     | P-value | OR                                         | (95% CI)      | P-value | OR                                             | (95% CI)     | P-value | OR                                             | (95% CI)      | P-value |
| <u>Ethnicity</u>                                |                                             |              |         |                                            |               |         |                                                |              |         |                                                |               |         |
| Caucasian                                       | 1                                           |              |         | 1                                          |               |         | 1                                              |              |         | 1                                              |               |         |
| Asian                                           | 0.38                                        | (0.10, 1.45) | 0.16    | 0.35                                       | (0.09, 1.40)  | 0.14    | 0.47                                           | (0.22, 0.97) | 0.04    | 0.29                                           | (0.12, 0.68)  | p<0.01  |
| Other                                           | 1.13                                        | (0.13, 10.2) | 0.9     | 1.34                                       | (0.14, 13.09) | 0.80    | 1.02                                           | (0.23, 4.54) | 0.9     | 1.00                                           | (0.19, 5.29)  | 1.00    |
| <u>Baseline SDI</u>                             |                                             |              |         |                                            |               |         |                                                |              |         |                                                |               |         |
| SDI = 0                                         | 1                                           |              |         | 1                                          |               |         | 1                                              |              |         | 1                                              |               |         |
| SDI $\geq$ 1                                    | 2.64                                        | (0.79, 8.79) | 0.11    | 2.42                                       | (0.70, 8.43)  | 0.16    | 3.23                                           | (1.58, 6.58) | p<0.01  | 2.88                                           | (1.32, 6.32)  | p<0.01  |
| <u>Time-adjusted mean SLEDAI (AMS)</u>          |                                             |              |         |                                            |               |         |                                                |              |         |                                                |               |         |
| AMS $\leq$ 4                                    | 1                                           |              |         | 1                                          |               |         | 1                                              |              |         | 1                                              |               |         |
| AMS > 4                                         | 1.35                                        | (0.45, 4.04) | 0.6     | 0.72                                       | (0.19, 2.72)  | 0.62    | 3.93                                           | (1.94, 7.97) | p<0.01  | 2.88                                           | (1.21, 6.89)  | 0.02    |
| <u>Time-adjusted mean prednisolone (mg/day)</u> |                                             |              |         |                                            |               |         |                                                |              |         |                                                |               |         |
| 1 <sup>st</sup> quartile (0, 0)                 | 1                                           |              |         | 1                                          |               |         | 1                                              |              |         | 1                                              |               |         |
| 2 <sup>nd</sup> quartile (0.04, 4.40)           | 1.03                                        | (0.14, 7.66) | 0.9     | 1.24                                       | (0.16, 9.57)  | 0.84    | 2.4                                            | (0.74, 7.79) | 0.14    | 2.50                                           | (0.71, 8.79)  | 0.15    |
| 3 <sup>rd</sup> quartile (4.45, 7.77)           | 2.11                                        | (0.36, 12.2) | 0.4     | 2.81                                       | (0.43, 18.36) | 0.28    | 4.61                                           | (1.49, 14.2) | p<0.01  | 3.81                                           | (1.08, 13.46) | 0.04    |
| 4 <sup>th</sup> quartile (7.82, 40.0)           | 3.44                                        | (0.65, 18.2) | 0.14    | 4.94                                       | (0.73, 33.50) | 0.10    | 6.51                                           | (2.12, 20.0) | p<0.01  | 4.57                                           | (1.22, 17.10) | 0.02    |

\*Odds ratios were adjusted for ethnicity, baseline SDI, AMS and time-adjusted mean prednisolone

\*\*Odds ratios were adjusted for ethnicity, baseline SDI, AMS and time-adjusted mean prednisolone

**Supplementary Table 3 – Domain specific damage accrual, stratified by glucocorticoid exposure**

| SDI domains               | Exposed to glucocorticoids ever? |                      | P-value* |
|---------------------------|----------------------------------|----------------------|----------|
|                           | No (n=41)<br>n (%)               | Yes (n=121)<br>n (%) |          |
| Ocular damage             | 4 (10%)                          | 6 (5%)               | 0.3      |
| Neuropsychological damage | 4 (10%)                          | 27 (22%)             | 0.08     |
| Renal damage              | 3 (7%)                           | 14 (12%)             | 0.4      |
| Pulmonary damage          | 1 (2%)                           | 10 (8%)              | 0.2      |
| Cardiovascular damage     | 6 (15%)                          | 15 (12%)             | 0.7      |
| Perivascular damage       | 4 (10%)                          | 10 (8%)              | 0.8      |
| Gastrointestinal damage   | 1 (2%)                           | 4 (3%)               | 0.8      |
| Musculoskeletal damage    | 8 (20%)                          | 36 (30%)             | 0.2      |
| Skin damage               | 4 (10%)                          | 13 (11%)             | 0.8      |
| Other damage              | 3 (7%)                           | 21 (17%)             | 0.12     |

\*P-values were calculated using Chi-squared tests for the difference in proportions

**Supplementary Table 4 – Patient characteristics characterized by glucocorticoid use**

|                                 | Glucocorticoid Use |                           |                       |                         |                      |                           | P-value |
|---------------------------------|--------------------|---------------------------|-----------------------|-------------------------|----------------------|---------------------------|---------|
|                                 | None (n=41)        |                           | Oral PNL only (n=110) |                         | Oral + IV PNL (n=11) |                           |         |
|                                 | Median             | [IQR] (range)             | Median                | [IQR] (range)           | Median               | [IQR] (range)             |         |
| Age at diagnosis (years)        | 38                 | [30, 52] (14, 69)         | 34                    | [27, 44] (10, 69)       | 28                   | [23, 49] (19, 56)         | 0.17    |
| Age at recruitment (years)      | 47.3               | [36.5, 55.3] (23.5, 78.5) | 41.7                  | [34, 53.6] (22.6, 76.8) | 39.3                 | [30.4, 55.3] (22.9, 56.6) | 0.23    |
| Duration of observation (years) | 3.5                | [1.7, 4.5] (1, 5.7)       | 3.6                   | [2, 5] (0, 6.3)         | 4.9                  | [4.2, 5.5] (2, 5.6)       | 0.03    |
| Number of clinic visits         | 10                 | [5, 13] (2, 23)           | 15                    | [10, 24] (2, 37)        | 30                   | [21, 41] (7, 47)          | p<0.01  |
| Cumulative prednisolone (g)     | 0                  | [0, 0] (0, 0)             | 6.4                   | [3.5, 9.4] (0.2, 50.2)  | 21.2                 | [16.0, 31.8] (14.8, 56.6) | p<0.01  |
| Number of ACR criteria          | 5                  | [4, 5] (4, 8)             | 5                     | [4, 6] (4, 9)           | 6                    | [5, 7] (4, 8)             | 0.06    |
| Baseline SLEDAI                 | 2                  | [0, 4] (0, 16)            | 4                     | [2, 8] (0, 22)          | 7                    | [0, 14] (0, 18)           | p<0.01  |
| Time adjusted mean SLEDAI (AMS) | 1.6                | [0.8, 3.1] (0, 6)         | 4.1                   | [2.4, 5.6] (0, 13.9)    | 6.7                  | [4.4, 8.4] (1.5, 11.3)    | p<0.01  |
| Time adjusted mean PGA          | 0.3                | [0.1, 0.4] (0, 1.1)       | 0.5                   | [0.3, 0.7] (0, 1.9)     | 1                    | [0.8, 1.2] (0.5, 1.4)     | p<0.01  |
| Baseline SDI                    | 0                  | [0, 1] (0, 3)             | 1                     | [0, 1] (0, 4)           | 1                    | [0, 3] (0, 4)             | 0.6     |
| Final SDI                       | 0                  | [0, 1] (0, 4)             | 1                     | [0, 2] (0, 9)           | 2                    | [1, 5] (0, 12)            | 0.019   |
|                                 | n                  | (%)                       | n                     | (%)                     | n                    | (%)                       |         |
| Female                          | 35                 | (85%)                     | 93                    | (85%)                   | 10                   | (91%)                     | 0.8     |
| <u>Ethnicity</u>                |                    |                           |                       |                         |                      |                           | 0.14    |
| Caucasians                      | 29                 | (71%)                     | 56                    | (51%)                   | 4                    | (36%)                     |         |
| Asians                          | 10                 | (24%)                     | 49                    | (45%)                   | 6                    | (55%)                     |         |
| Other                           | 2                  | (5%)                      | 5                     | (5%)                    | 1                    | (9%)                      |         |
| Current smoker                  | 6                  | (21%)                     | 18                    | (21%)                   | 2                    | (20%)                     | 0.9     |
| Hydroxychloroquine ever         | 38                 | (93%)                     | 104                   | (95%)                   | 11                   | (100%)                    | 0.6     |

|                                          |          |          |           |        |
|------------------------------------------|----------|----------|-----------|--------|
| Other immunosuppressant ever             | 13 (32%) | 97 (88%) | 11 (100%) | p<0.01 |
| No. of patients with AMS > 4             | 4 (10%)  | 57 (52%) | 9 (82%)   | p<0.01 |
| No. of patients with $\Delta$ SDI > 0    | 6 (15%)  | 41 (37%) | 10 (91%)  | p<0.01 |
| No. of patients with $\Delta$ GC-SDI > 0 | 2 (5%)   | 11 (10%) | 1 (9%)    | 0.6    |
