# Supplementary figures and images for: Independent association of glucocorticoids with damage accrual in SLE
Source: PubMed Central journal article supplement — Lupus Sci Med. 2016 Nov 22;3(1):e000157. doi: 10.1136/lupus-2016-000157 (PMC5133410; doi:10.1136/lupus-2016-000157), 2016-11-22

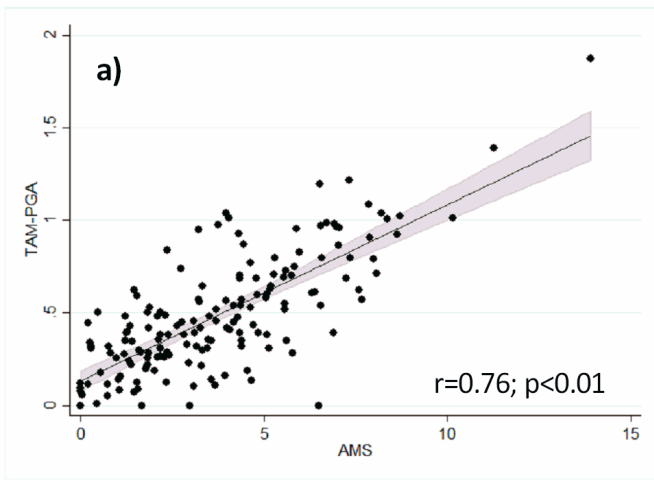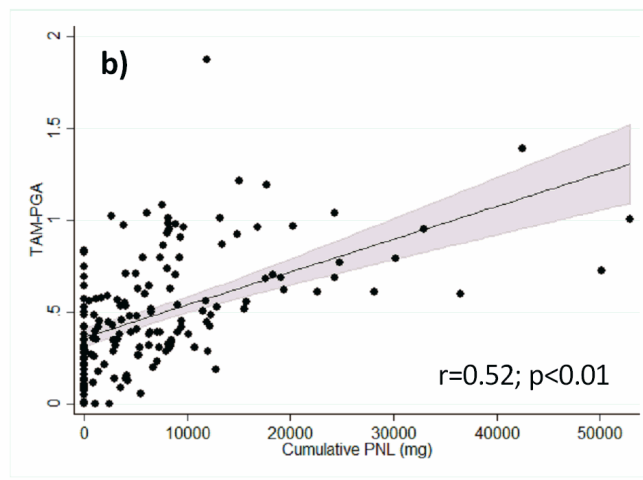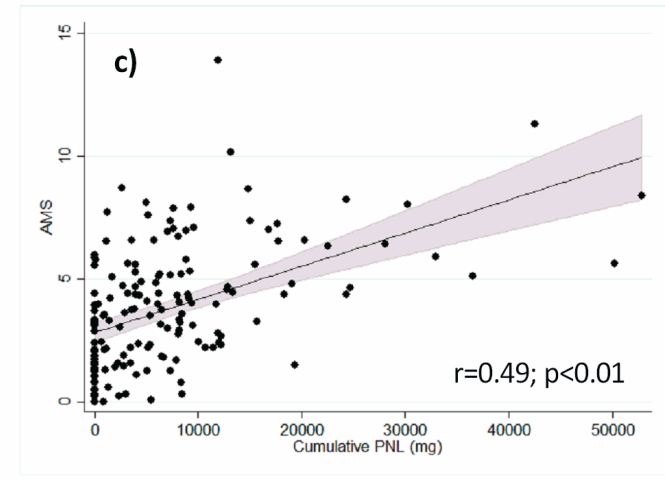

Supplement: lupus-2016-000157supp_figure.pdf [file lupus-2016-000157supp_figure.pdf]
